# Supplementary material for: Mechanically-induced remodeling of the cell surface generates actin-rich protrusions resembling tunneling nanotubes
Source: Research Square preprint supplement (doi:10.21203/rs.3.rs-8273404/v1), 2025-12-05
Supplement: Supplementary file 1 [file 0c40e3e02be5b12280f41948.docx]

**Table 2: Parameters for tether recoil using different cells lines.**

| Immediately after TE | | | | | | | |
| --- | --- | --- | --- | --- | --- | --- | --- |
| Cell Type |  |  |  |  |  |  |  |
| **HBMEC** | 0.91 ± 0.02 | 0.95 ± 0.05 | 0.04 ± 0.01 | 10 ± 7 | 0.06 ± 0.02 | 28 ± 1 | 3.1 ± 0.3 |
| **HeLa** | 0.67 ± 0.02 | 1.11 ± 0.08 | 0.27 ± 0.02 | 10 ± 1 | 0.07 ± 0.03 | 22 ± 1 | 3.6 ±0.4 |
| **SH-SY5Y** | 0.72 ± 0.03 | 0.38 ± 0.05 | 0.21 ± 0.03 | 3.2 ± 0.3 | 0.07 ± 0.04 | 22.4±0.1 | 1.5 ± 0.2 |
| **3T3- L1 (ADIPOCYTE)** | 0.893 ± 0.004 | 0.23 ± 0.01 | 0.045 ± 0.004 | 6.6 ± 0.9 | 0.062 ± 0.006 | 29 ± 1 | 0.83 ± 0.08 |
| **RAW 264.7** | 0.60 ± 0.03 | 0.43 ± 0.06 | 0.32 ± 0.03 | 3.2 ± 0.2 | 0.07 ± 0.05 | 27 ± 1 | 1.7 ± 0.3 |
| **5 min after TE** | | | | | | | |
| **Cell Type** |  |  |  |  |  |  |  |
| **HBMEC** | 0.12± 0.08 | 1.2 ± 0.5 | 0.18 ± 0.08 | 4 ± 1 | 0.7 ± 0.1 | 27 ± 2 | 23 ± 10 |
| **HeLa** | 0.132 ± 0.002 | 1.43 ± 0.07 | 0.868 ± 0.002 | 475 ± 30 | *Undefined* | 21 ± 1 | 20 ± 2 |
| **SH-SY5Y** | 0.07 ± 0.02 | 1.2 ± 0.3 | 0.32 ± 0.01 | 8.9 ± 0.9 | 0.60 ± 0.02 | 21 ± 1 | 27 ± 6 |
| **3T3-L1 (ADIPOCYTE)** | 0.067 ± 0.002 | 0.66 ± 0.03 | 0.323 ± 0.005 | 14.7 ± 0.6 | 0.610 ± 0.005 | 28 ± 1 | 26 ± 3 |
| **RAW 264.7** | 0.24 ± 0.02 | 1.5 ± 0.1 | 0.39 ± 0.02 | 20 ± 4 | 0.37 ± 0.03 | 25 ± 1 | 14 ± 2 |
