# Supplementary material for: Mechanically-induced remodeling of the cell surface generates actin-rich protrusions resembling tunneling nanotubes
Source: Research Square preprint supplement (doi:10.21203/rs.3.rs-8273404/v1), 2025-12-05
Supplement: Supplementary file 2 [file 6c5accc6dde62ea7484fec25.docx]

**Table 1: Parameters for tether recoil of NIH3T3 cells treated with distinct compounds and concentrations.**

| Immediately after TE | | | | | | | |
| --- | --- | --- | --- | --- | --- | --- | --- |
| NIH3T3 |  |  |  |  |  |  |  |
| **Control** | 0.920 ± 0.006 | 0.67 ± 0.02 | 0.055 ± 0.004 | 164 ± 4 | 0.026 ± 0.008 | 29 ± 1 | 2.1 ± 0.2 |
| **CytoD 2.5 µM** | 0.54 ± 0.01 | 0.53 ± 0.03 | 0.35 ± 0.01 | 4.4 ± 0.1 | 0.12 ± 0.02 | 16 ± 1 | 1.4 ± 0.1 |
| **CytoD 5.0 µM** | 0.76 ± 0.01 | 0.48 ± 0.03 | 0.19 ± 0.01 | 6.8 ± 0.5 | 0.06 ± 0.02 | 14 ± 1 | 0.9 ± 0.1 |
| **SMIFH2 40µM** | 0.84 ± 0.03 | 1.06 ± 0.08 | 0.13 ± 0.03 | 4.9 ± 0.7 | 0.03 ± 0.04 | 21 ± 1 | 2.3 ± 0.3 |
| **CK666 50 µM** | 0.56 ± 0.02 | 0.70 ± 0.03 | 0.39 ± 0.02 | 3.4 ± 0.1 | 0.06 ± 0.02 | 26 ± 1 | 2.7 ± 0.3 |
| **BBI 10 µM** | 0.72 ± 0.09 | 1.3 ± 0.1 | 0.11 ± 0.09 | 5± 2 | 0.2 ± 0.1 | 28 ± 2 | 4.5 ± 0.8 |
| **MCD 10 mM** | 0.742 ± 0.007 | 0.72 ± 0.01 | 0.060 ± 0.006 | 8 ± 1 | 0.198 ± 0.009 | 25 ± 2 | 2.8 ± 0.2 |
| 5 min after TE | | | | | | | |
| **NIH3T3** |  |  |  |  |  |  |  |
| **Control** | 0.067 ± 0.002 | 0.66 ± 0.03 | 0.323 ± 0.005 | 14.7 ± 0.6 | 0.610 ± 0.005 | 28 ± 1 | 21 ± 2 |
| **CytoD 2.5 µM** | 0.106 ± 0.005 | 0.53 ± 0.05 | 0.263 ± 0.004 | 9.3 ± 0.4 | 0.630 ± 0.007 | 15 ± 1 | 6.2 ± 0.8 |
| **CytoD 5.0 µM** | 0.252 ± 0.003 | 1.81 ± 0.05 | 0.580 ± 0.003 | 37.7 ± 0.4 | 0.168 ± 0.004 | 14 ± 1 | 9.0 ± 0.9 |
| **SMIFH2 40µM** | 0.457 ± 0.002 | 0.589 ± 0.008 | 0.380 ± 0.002 | 12.7 ± 0.3 | 0.163 ± 0.003 | 20 ± 1 | 2.5 ± 0.2 |
| **CK666 50 µM** | 0.17 ± 0.02 | 1.3 ± 0.1 | 0.27± 0.01 | 8.4 ± 0.7 | 0.67 ± 0.02 | 27 ± 2 | 16 ± 1 |
| **BBI 10 µM** | 0.092 ± 0.005 | 0.66 ± 0.06 | 0.144 ± 0.005 | 6.4 ± 0.4 | 0.764 ± 0.007 | 26 ± 2 | 16 ± 2 |
| **MCD 10 mM** | 0.156 ± 0.005 | 1.41 ± 0.05 | 0.094 ± 0.005 | 17 ± 4 | 0.750 ± 0.007 | 21 ± 2 | 21 ± 2 |
